# Supplementary material
Source: PubMed Central journal article supplement (PMC5312611)
Supplement: Supp_Table1.pdf [file Supp_Table1.pdf]

## Supplementary Data

SUPPLEMENTARY TABLE S1. MEAN VALUES  
AND STANDARD DEVIATION FOR PREDICTOR  
AND OUTCOME VARIABLES IN REGRESSION MODELS

|                                                                              | <i>Mean (SD)</i> |
|------------------------------------------------------------------------------|------------------|
| <b>CD8<sup>+</sup> T cell markers</b>                                        |                  |
| CD8 <sup>+</sup> CD38 <sup>+</sup> , %                                       | 2.7 (2.1)        |
| CD8 <sup>+</sup> CD38 <sup>+</sup> DR <sup>+</sup> , %                       | 0.38 (0.47)      |
| CD8 <sup>+</sup> PD1 <sup>+</sup> , %                                        | 34.4 (11.2)      |
| CD8 <sup>+</sup> CD57 <sup>+</sup> , %                                       | 30.1 (13.3)      |
| CD8 <sup>+</sup> CD45RO <sup>+</sup> , %                                     | 45.0 (16.1)      |
| CD8 <sup>+</sup> CD45RO <sup>+</sup> CCR7 <sup>+</sup> CD27 <sup>+</sup> , % | 46.7 (11.8)      |
| <b>CD4<sup>+</sup> T cell markers</b>                                        |                  |
| CD4 <sup>+</sup> CD38 <sup>+</sup> , %                                       | 8.6 (4.5)        |
| CD4 <sup>+</sup> CD38 <sup>+</sup> DR <sup>+</sup> , %                       | 0.24 (0.20)      |
| CD4 <sup>+</sup> PD1 <sup>+</sup> , %                                        | 40.9 (13.9)      |
| CD4 <sup>+</sup> CD57 <sup>+</sup> , %                                       | 10.0 (12.5)      |
| CD4 <sup>+</sup> CD45RO <sup>+</sup> , %                                     | 61.9 (12.8)      |
| CD4 <sup>+</sup> CD45RO <sup>+</sup> CCR7 <sup>+</sup> CD27 <sup>+</sup> , % | 38.3 (12.8)      |
| <b>Inflammatory biomarkers</b>                                               |                  |
| High sensitivity C-reactive protein, mg/l                                    | 4.8 (6.3)        |
| Interleukin-6, pg/ml                                                         | 4.3 (3.0)        |
| TNF- $\alpha$ receptor 1, ng/ml                                              | 12.3 (3.8)       |
| TNF- $\alpha$ receptor 2, ng/ml                                              | 16.8 (4.1)       |
| <b>Macrophage activation markers</b>                                         |                  |
| Soluble CD14, $\mu$ g/ml                                                     | 1.7 (0.4)        |
| Soluble CD163, ng/ml                                                         | 584 (246)        |
| Macrophage inflammatory protein-1 $\alpha$ , pg/ml                           | 184 (153)        |
| <b>Outcome variables</b>                                                     |                  |
| Maximal brachial artery FMD, %                                               | 8.7 (4.1)        |
| ICAM-1, ng/ml                                                                | 568 (158)        |
| VCAM-1, ng/ml                                                                | 594 (190)        |

ICAM-1, intercellular adhesion molecule 1; FMD, flow-mediated dilation; TNF- $\alpha$ , tumor necrosis factor- $\alpha$ ; VCAM-1, vascular cell adhesion molecule 1.
